# Supplementary material for: Imaging Plate Autoradiography for Ingested Anthropogenic Cesium-137 in Butterfly Bodies: Implications for the Biological Impacts of the Fukushima Nuclear Accident
Source: MDPI journal article supplement (doi:10.3390/life13051211), 2023-05-18
Supplement: s1 [file s1]

## **Supplementary Materials**

# **Imaging Plate Autoradiography for Ingested Anthropogenic Cesium-137 in Butterfly Bodies: Implications for the Biological Impacts of the Fukushima Nuclear Accident**

**Ko Sakauchi and Joji M. Otaki \***

The BCPH Unit of Molecular Physiology, Department of Chemistry, Biology and Marine Science,  
Faculty of Science, University of the Ryukyus, Nishihara, Okinawa 903-0213, Japan

\* Correspondence: [otaki@sci.u-ryukyu.ac.jp](mailto:otaki@sci.u-ryukyu.ac.jp); Tel.: +81-98-895-8557

**Supplementary Tables S1, S2, and S3**

Supplementary Table S1    Mean PSL values of the whole adult bodies, the pupal cuticle cases, and the whole pupal bodies

|                          |    |   | Mean PSL ± SD ( <i>n</i> )   |                               |                                 |                                 |                                               |
|--------------------------|----|---|------------------------------|-------------------------------|---------------------------------|---------------------------------|-----------------------------------------------|
| Sex                      |    |   | One day                      | Two days                      | Four days                       | Six days                        | Eight days                                    |
| Adult body               | H0 | M | 7,029 ± 2,776 (3)            | 10,701 ± 7,168 (3)            | 65,039 ± 29,931 (3)             | 65,385 ± 33,475 (3)             | 119,647 ± 71,876 (3)                          |
|                          |    | F | 10,746 ± 5,705 (3)           | 14,461 ± 14,310 (3)           | 95,270 ± 17,267 (3)             | 182,120 ± 31,953 (3)            | 191,163 ± 37,786 (3)                          |
|                          | H3 | M | 19,165 ± 7,108 (3)           | 40,284 ± 12,229 (3)           | 158,591 ± 43,752 (3)            | 263,431 ± 79,816 (3)            | 366,442 ± 137,552 (3)                         |
|                          |    | F | 39,642 ± 21,307 (3)          | 126,582 ± 32,352 (3)          | 460,280 ± 184,681 (3)           | 810,413 ± 259,789 (3)           | 1,173,289 ± 439,976 (3)                       |
|                          | H4 | M | 195,493 ± 58,919 (3)         | 465,275 ± 134,602 (3)         | 1,428,086 ± 451,412 (3)         | 2,483,090 ± 768,203 (3)         | 4,124,153 ± 1,308,203 (3)                     |
|                          |    | F | 534,350 ± 107,045 (3)        | 1,472,489 ± 252,757 (3)       | 3,765,216 ± 767,551 (3)         | 6,998,388 ± 1,604,039 (3)       | 11,524,425 ± 2,935,287 (3)                    |
|                          | H5 | M | 1,018,049 ± 1,002,956 (3)    | 2,148,531 ± 1,553,521 (3)     | 6,763,006 ± 5,645,805 (3)       | 6,189,087 ± 9,642,053 (3)       | 18,333,064 ± 15,106,715 (3)                   |
|                          |    | F | 13,093,216 ± 10,066,089 (3)  | 30,604,654 ± 22,931,175 (3)   | 70,919,911 ± 51,879,874 (3)     | 114,649,272 ± 82,598,135 (3)    | 161,330,743 ± 113,471,727 (3)                 |
|                          | H6 | M | 46,899,765 ± 73,540,732 (3)  | 96,710,009 ± 147,211,478 (3)  | 208,441,315 ± 309,763,047 (3)   | 327,712,480 ± 478,447,671 (3)   | 483,780,603 ± 698,145,398 (3)                 |
|                          |    | F | 232,609,445 ± 23,017,823 (3) | 498,706,390 ± 62,463,030 (3)  | 1,024,319,754 ± 117,281,705 (3) | 1,572,196,188 ± 155,569,884 (3) | 2,116,998,550 ± 158,964,768* <sup>1</sup> (3) |
| Pupal case* <sup>2</sup> | H0 | M | —                            | 11,993 ± 9,053 (3)            | —                               | —                               | —                                             |
|                          |    | F | —                            | 25,558 ± 5,091 (3)            | —                               | —                               | —                                             |
|                          | H3 | M | —                            | 65,954 (1)                    | —                               | —                               | —                                             |
|                          |    | F | —                            | 178,673 ± 22,733 (3)          | —                               | —                               | —                                             |
|                          | H4 | M | —                            | 738,088 ± 563,246 (3)         | —                               | —                               | —                                             |
|                          |    | F | —                            | 1,274,027 ± 423,189 (3)       | —                               | —                               | —                                             |
|                          | H5 | M | —                            | 17,661,038 (1)                | —                               | —                               | —                                             |
|                          |    | F | —                            | 48,214,774 ± 31,486,430 (3)   | —                               | —                               | —                                             |
|                          | H6 | M | —                            | —                             | —                               | —                               | —                                             |
|                          |    | F | —                            | 450,357,498 ± 119,145,968 (3) | —                               | —                               | —                                             |

|      |    |                  |   |                                 |   |   |   |
|------|----|------------------|---|---------------------------------|---|---|---|
| Pupa | H0 | UK* <sup>3</sup> | — | 123,516 ± 20,135 (3)            | — | — | — |
|      | H3 | UK               | — | 812,615 ± 194,991 (3)           | — | — | — |
|      | H4 | UK               | — | 6,693,791 ± 1,871,682 (3)       | — | — | — |
|      | H5 | UK               | — | 97,274,367 ± 24,257,439 (3)     | — | — | — |
|      | H6 | UK               | — | 2,038,394,060 ± 883,388,380 (3) | — | — | — |

Numbers of individuals examined are indicated in parentheses. Mean ± standard deviation values are shown.

\*<sup>1</sup>: Females of H6 for the eight-day exposure were beyond the maximum detection limit.

\*<sup>2</sup>: The pupal cases were obtained after the eclosion to the adults but not after the pupation.

\*<sup>3</sup>: Sex of pupae is unknown.

—: Not applicable.

Supplementary Table S2    Mean PSL values of the adult body parts

|     |   | Mean PSL for 2-d exposure ± SD ( <i>n</i> ) |                           |                         |                           |                             |                              |
|-----|---|---------------------------------------------|---------------------------|-------------------------|---------------------------|-----------------------------|------------------------------|
| Sex |   | Wings* <sup>1</sup>                         | Antennae                  | Legs* <sup>2</sup>      | Head                      | Thorax                      | Abdomen                      |
| H6  | M | 1,372,869 ± 591,363 (3)                     | 1,445,011 (1)             | 703,834 ± 765,335 (2)   | 1,121,807 ± 602,136 (3)   | 2,582,828 ± 2,562,044 (3)   | 78,380,317 ± 127,653,010 (3) |
|     | F | 5,268,543 ± 5,068,217 (3)                   | 3,114,719 ± 1,170,374 (3) | 2,970,962 ± 213,062 (2) | 7,135,176 ± 4,691,791 (3) | 30,487,767 ± 19,243,246 (3) | 320,493,204 ± 93,573,185 (3) |

Numbers of individuals examined are indicated in parentheses. Mean ± standard deviation values are shown.

\*1: Wings indicate the sum of the four wings.

\*2: Legs indicate the sum of the six legs.

**Supplementary Table S3   Mean values of the adult weights**

|                  |     | Mean mg $\pm$ SD ( <i>n</i> ) |                     |                     |                     |                     |                     |                     |                     |
|------------------|-----|-------------------------------|---------------------|---------------------|---------------------|---------------------|---------------------|---------------------|---------------------|
|                  | Sex | Whole body                    | Pupal case          | Wings* <sup>2</sup> | Antennae            | Legs* <sup>3</sup>  | Head                | Thorax              | Abdomen             |
| H0* <sup>1</sup> | M   | 3.91 $\pm$ 0.94 (7)           | 0.84 $\pm$ 0.85 (7) | 1.03 $\pm$ 0.17 (8) | 0.08 $\pm$ 0.02 (7) | 0.15 $\pm$ 0.03 (5) | 0.24 $\pm$ 0.03 (8) | 1.21 $\pm$ 0.27 (5) | 1.06 $\pm$ 0.45 (5) |
|                  | F   | 6.58 $\pm$ 0.84 (7)           | 0.86 $\pm$ 1.02 (7) | 1.27 $\pm$ 0.15 (8) | 0.12 $\pm$ 0.01 (7) | 0.22 $\pm$ 0.02 (6) | 0.24 $\pm$ 0.02 (7) | 1.78 $\pm$ 0.24 (5) | 2.56 $\pm$ 0.66 (5) |

Numbers of individuals examined are indicated in parentheses. Mean  $\pm$  standard deviation values are shown.

\*<sup>1</sup>: These samples were used only for measuring weights and not for IP exposures.

\*<sup>2</sup>: Wings indicate the sum of the four wings.

\*<sup>3</sup>: Legs indicate the sum of the six legs.
